# Supplementary material for: Ultrathin MoS2 wrapped N-doped carbon-coated cobalt nanospheres for OER applications
Source: Royal Society of Chemistry journal article supplement (doi:10.1039/d0se01543a), 2020-12-10
Supplement: d0se01543a1.pdf [file d0se01543a1.pdf]

## Ultrathin MoS<sub>2</sub> wrapped N-doped carbon coated cobalt nanospheres for OER application

*Ashish Gaur, <sup>a</sup>Parrydeep K Sachdeva, <sup>a</sup>Rajinder Kumar, <sup>a</sup>Takahiro Maruyama, <sup>a</sup>Chandan  
Bera, <sup>a</sup> and Vivek Bagchi\**

a. Institute of Nano Science and Technology, Phase-10, Sector-64, Mohali, Punjab 160062,  
India

b. Department of Applied Chemistry, Meijo University, 1-501 Shiogamaguchi, Tempaku,  
Nagoya 468-8502, Japan.

\*Corresponding author: [vivekbagchi@gmail.com](mailto:vivekbagchi@gmail.com), [bagchiv@inst.ac.in](mailto:bagchiv@inst.ac.in)

# Electronic Supplementary Information

**S1.1 PXRD spectra of the Co-MOF**

**S1.2 PXRD spectra of MoS<sub>2</sub> and Co@NC with JCPDS stacking**

**S2. Raman spectra of Co@NC@MoS<sub>2</sub> and Co@NC**

**S3. BET surface area analysis of Co@NC@MoS<sub>2</sub>**

**S4.1. SEM elemental mapping of Co@NC.**

**S4.2. EDAX analysis of the as synthesized catalyst Co@NC@MoS<sub>2</sub>**

**S5.1. XPS wide scan survey spectrum of catalyst and HR spectra of Mo 3P, and N1s**

**S5.2. Deconvoluted peak parameters of the XPS analysis.**

**S5.3. Elemental percentage obtained from XPS analysis**

**S6. Comparative table of electrochemical properties of recently reported Co@NC based electrocatalyst.**

**S7.1 HRTEM analysis of catalyst after durability test**

**S7.2 PXRD spectra of catalyst after durability test**

**S8.1. LSV curve of pristine Co-BDC MOF and Co@NC@MoS<sub>2</sub>**

**S8.2. ECSA normalized LSV curves of Co@NC@MoS<sub>2</sub> and Co@NC**

**S8.3. Durability test of Co@NC**

**S8.4. CV of all the catalysts for C<sub>dl</sub> calculations.**

**S9. Theoretical studies**

### S1.1 PXRD spectra of as synthesized Co-MOF

The XRD pattern was obtained in the  $2\theta$  angular region of  $5^\circ$  to  $30^\circ$  with an increment of  $0.00190/\text{Step}$ .

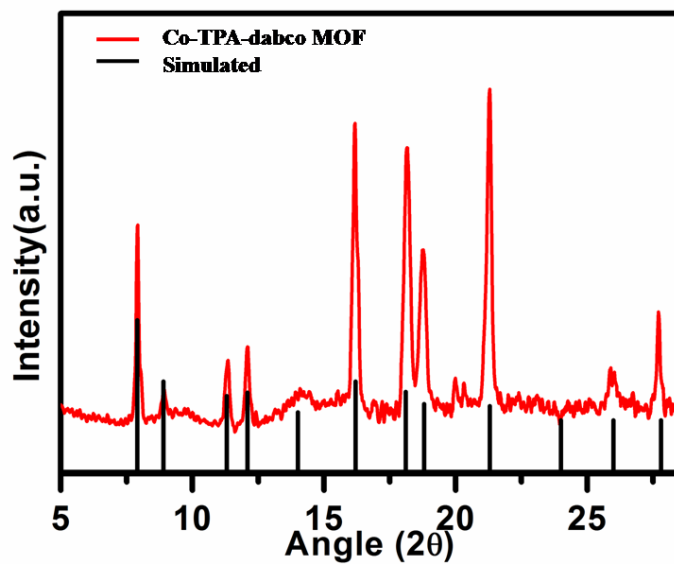

Figure S1. PXRD spectrum of Co-DABCO-BDC-MOF

### S1.2. PXRD spectra of $\text{MoS}_2$ and $\text{Co@NC}$ with JCPDS stacking

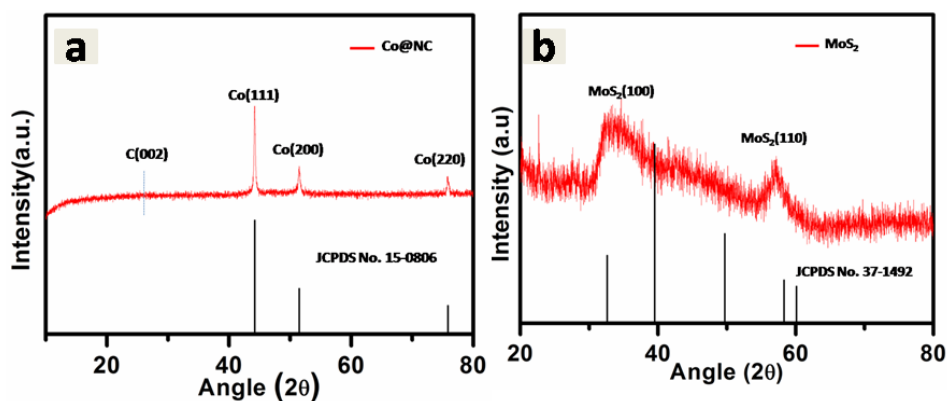

Figure S2. PXRD spectrum of  $\text{MoS}_2$  and  $\text{Co@NC}$  with corresponding JCPDS file

## S2. Raman spectrum of Co@NC and Co@NC@MoS<sub>2</sub>.

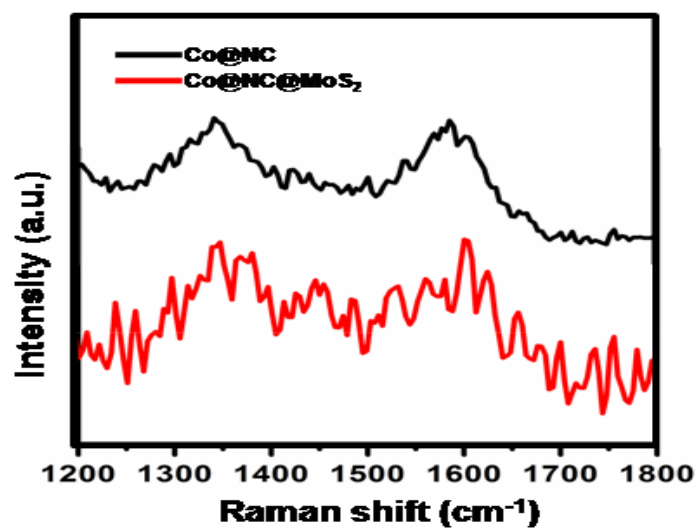

**Figure S3** Raman spectroscopy showing the presence of graphitic carbon in the both Co@NC and Co@NC@MoS<sub>2</sub>

## S3. BET surface area analysis of Co@NC@MoS<sub>2</sub>.

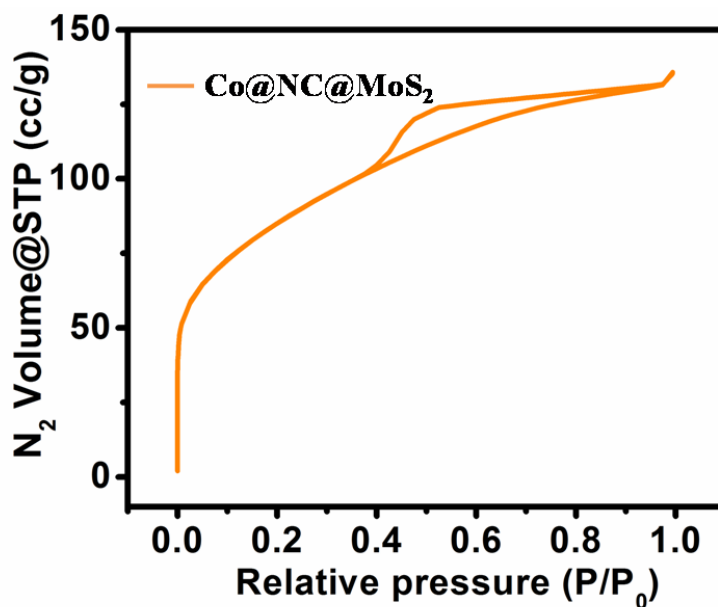

**Figure S4** BET of Co@NC@MoS<sub>2</sub>.

### S4.1. SEM elemental mapping of Co@NC precursor

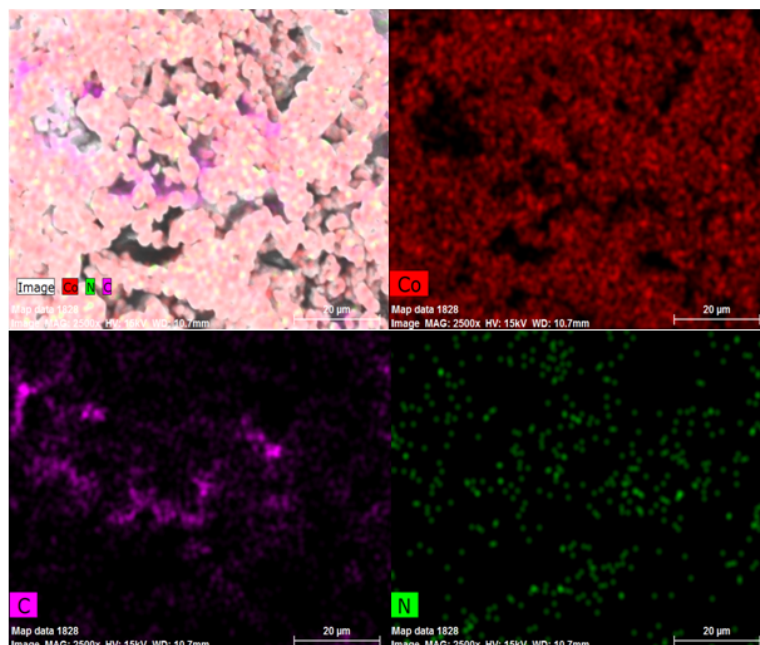

**Figure S5** Elemental mapping of Co@NC show the presence of Co, C and N in the catalyst distributed uniformly throughout the sample.

### S4.2. EDAX analysis of the as synthesized catalyst Co@NC@MoS<sub>2</sub>

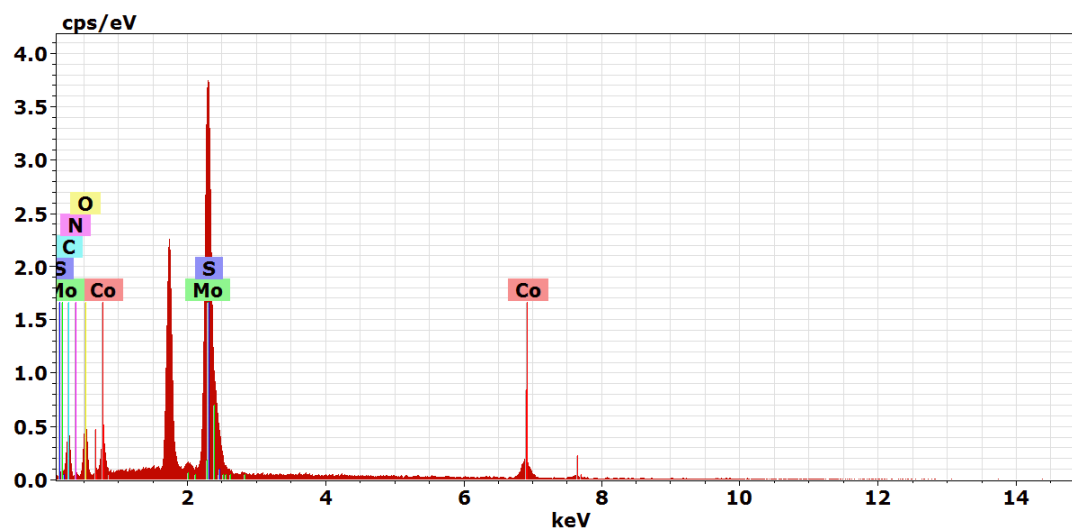

**Figure S6.** EDAX spectrum of Co@NC@MoS<sub>2</sub>, the unlabeled peak in the spectrum is of Si as the analysis was carried out on silicon wafer.

### S5.1. XPS wide range spectra of Co@NC@MoS<sub>2</sub> and HR spectra of N1s

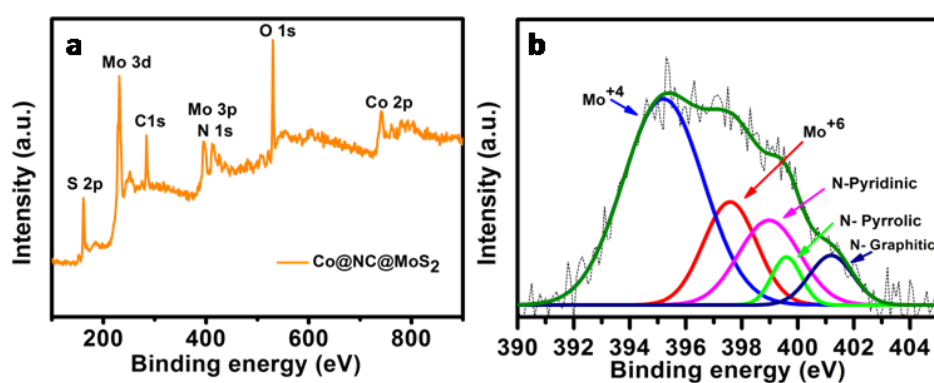

**Figure S7 (a)** XPS wide angle spectrum of Co@NC@MoS<sub>2</sub> the spectrum consist of Mo, S, O, Co, N and C elements present in the catalyst **(b)** The deconvoluted XPS spectra of N1s overlapped with Mo 3p

S5.2. Table containing the various parameters obtained after the deconvolution of XPS spectra.

| Element       | Peak                       | BE (eV)         | FWHM          | Area (%)        |
|---------------|----------------------------|-----------------|---------------|-----------------|
| Mo 3d         | Mo <sup>4+</sup>           | 228.7 and 231.8 | 1.7 and 1.8   | 23.7 and 51.9   |
|               | Mo <sup>6+</sup>           | 234.6 and 235.2 | 2.0 and 2.06  | 10.5 and 10.6   |
|               | S 2s                       | 225.6           | 1.7           | 3.2             |
| S 2p          | S <sup>2-</sup>            | 261.4 and 162.6 | 1.66 and 1.28 | 56.09 and 22.58 |
|               | S <sup>2-</sup> (bridging) | 163.7           | 2.30          | 21.32           |
| C 1s          | C=C/C-C                    | 284.4           | 2.674         | 59.7            |
|               | C-O/C-N                    | 286.2           | 2.638         | 24.6            |
|               | C=O                        | 288.5           | 2.312         | 15.6            |
| Co 2p         | Co(o)                      | 778.8           | 1.78          | 17.24           |
|               | Co-N                       | 779.6           | 1.77          | 25.50           |
|               | Co <sup>+2</sup>           | 781.5           | 1.78          | 30.43           |
|               | Co <sup>+3</sup>           | 783.3           | 1.76          | 20.07           |
| Mo 3p&<br>N1s | Mo <sup>4+</sup>           | 395.1           | 3.37          | 53.74           |
|               | Mo <sup>6+</sup>           | 397.5           | 2.24          | 17.82           |
|               | N-Pyridinic                | 398.9           | 2.57          | 16.84           |
|               | N-Pyrrolic                 | 399.5           | 1.24          | 4.59            |
|               | N- Graphitic               | 401.1           | 1.8           | 6.98            |

Table S1 Deconvoluted peak parameters of the XPS analysis

S5.3. Elemental percentage obtained from XPS analysis.

| Elements | Atomic % |
|----------|----------|
| Mo       | 16.21    |
| S        | 33.94    |
| C        | 20.24    |
| N        | 7.23     |
| Co       | 15.14    |
| O        | 7.04     |

Table S2 Elemental percentage obtained from XPS analysis

**S6 Comparative table of the electrochemical activity of previously reported Co@NC and MoS<sub>2</sub> based catalyst**

| <b>Material</b>              | <b>Electrolyte</b> | <b>Substrate</b> | <b>Overpotential<br/>(10 mA cm<sup>-2</sup>)</b> | <b>Tafel slope</b> | <b>Reference</b> |
|------------------------------|--------------------|------------------|--------------------------------------------------|--------------------|------------------|
| Co@NC800                     | 0.1 M KOH          | GCE              | 371 mV                                           | 61.4 mV/dec        | 1                |
| CoA@CNC700                   | 0.1 M KOH          | RDE              | 460 mV                                           | -                  | 2                |
| Co@NPC-H                     | 1 M KOH            | RDE              | 350 mV                                           | 57.1 mV/dec        | 3                |
| Cs-Co/C-1000                 | 1 M KOH            | GCE              | 290                                              | 70 mV/dec          | 4                |
| MoS <sub>2</sub> QDs         | 1M KOH             | GCE              | 370                                              | 39 mV/dec          | 5                |
| Co-MoS <sub>2</sub> /BCCF-21 | 1M KOH             | Carbon cloth     | 260                                              | 85 mV/dec          | 6                |
| <b>Co@NC@MoS<sub>2</sub></b> | <b>1 M KOH</b>     | <b>GCE</b>       | <b>297</b>                                       | <b>70 mV/dec</b>   | <b>This work</b> |

**Table S3** Comparative table of electrochemical properties of recently reported Co and MoS<sub>2</sub> based electrocatalyst.

**S7.1 after stability analysis of the catalyst Co@NC@MoS<sub>2</sub> using High resolution TEM**



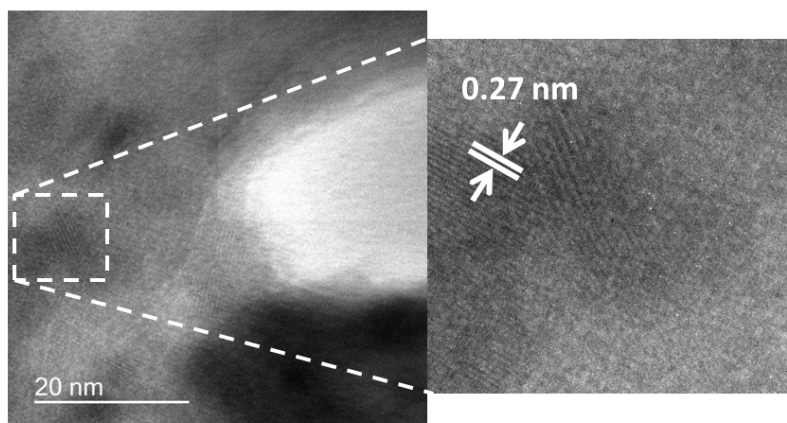

**Figure S8** HRTEM images of Co@NC@MoS<sub>2</sub> catalyst after the durability test.

### S7.2 After stability analysis of the catalyst Co@NC@MoS<sub>2</sub> using PXRD

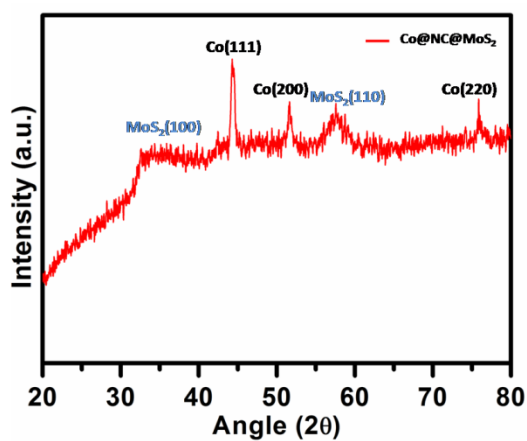

**Figure S9** PXRD of the catalyst after 10 hr of stability

### S8.1. LSV curve of pristine Co-TPA-BDC MOF and Co@NC@MoS<sub>2</sub>

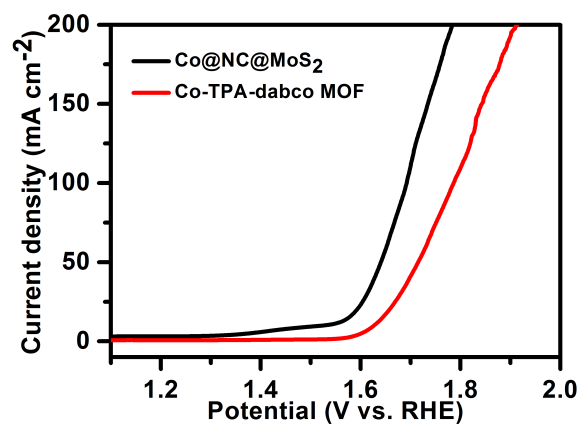

**Figure S10.** Comparison of the LSV of the pristine MOF and Co@NC@MoS<sub>2</sub>

### S8.2. ECSA normalized LSV curves of Co@NC@MoS<sub>2</sub> and Co@NC

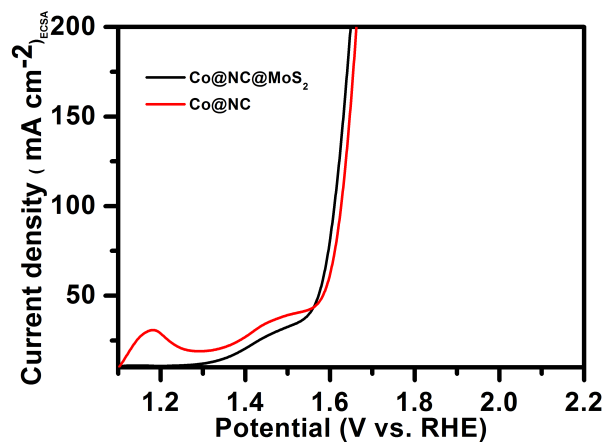

**Figure S11** ECSA normalised OER activity of Co@NC@MoS<sub>2</sub> and Co@NC

### S8.3. Stability test of Co@NC

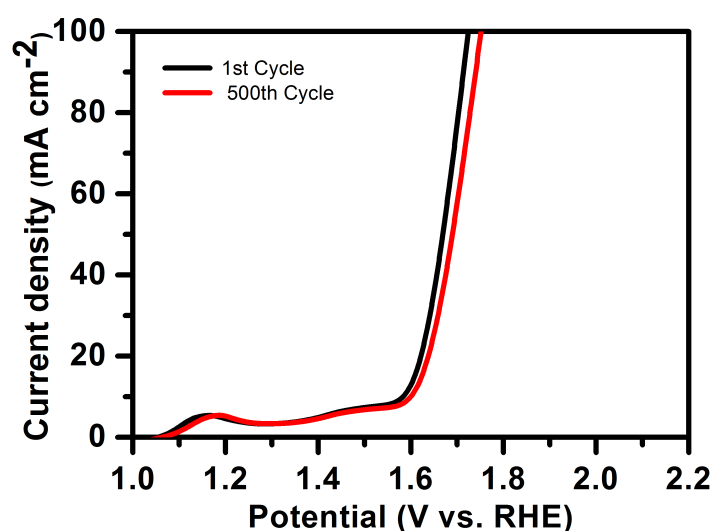

**Figure S12.** Durability test of Co@NC using GCE in 1M KOH

The durability test for the precursor Co@NC was done by continuously running 500 linear sweep voltammetry cycles. The significant change in the overpotential was found after 500 LSV cycles depicting the less stability of the precursor Co@NC.

S8.4. Cyclic voltammetry curve of Co@NC@MoS<sub>2</sub>, Co@NC and MoS<sub>2</sub> in non faradic region

region

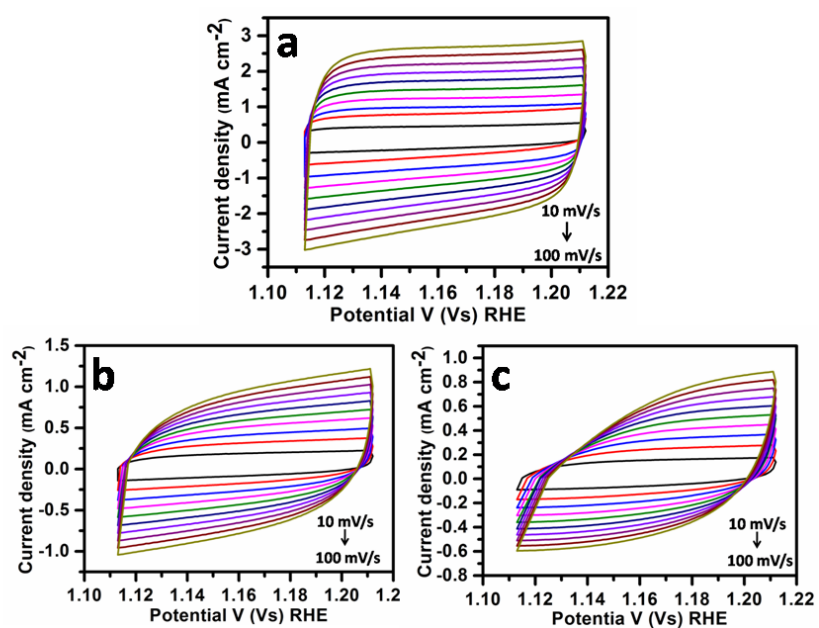

**Figure S13** Cyclic voltammetry curve of (a) Co@NC@MoS<sub>2</sub>, (b) Co@NC and (c) MoS<sub>2</sub> for the calculation of C<sub>dl</sub>

## S9 Theoretical details

Density functional theory has been used to simulate theoretical models to observe the different active sites for O\* and OH\* adsorption on the Co@NC@MoS<sub>2</sub> heterostructure. Here, we present the detailed steps to understand the OER mechanism, which is a four electron transfer process.

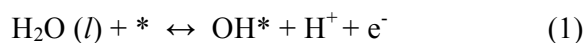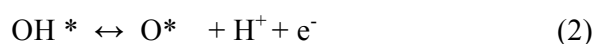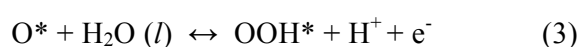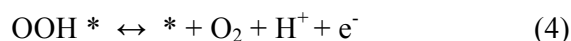

where \* stands for an active site on the surface of heterostructure. O\*, OH\* and OOH\* are adsorbed intermediates. Gibbs energy determines whether a process will be spontaneous or not. For each step, Gibbs energy can be calculated as

$$\begin{aligned} \Delta G_1 &= \Delta G(\text{OH}^*) - \Delta G(\text{H}_2\text{O}) + \text{K}T \ln a_{\text{H}^+} - eU \\ &= E(\text{OH}^*) - E(*) - [\text{E}(\text{H}_2\text{O}) - 1/2\text{E}(\text{H}_2)] + \Delta \text{ZPE} - T\Delta S + \text{K}T \ln a_{\text{H}^+} - eU \end{aligned} \quad (5)$$

$$\begin{aligned} \Delta G_2 &= \Delta G(\text{O}^*) - \Delta G(\text{OH}^*) + \text{K}T \ln a_{\text{H}^+} - eU \\ &= E(\text{O}^*) - E(\text{OH}^*) + 1/2\text{E}(\text{H}_2) + \Delta \text{ZPE} - T\Delta S + \text{K}T \ln a_{\text{H}^+} - eU \end{aligned} \quad (6)$$

$$\begin{aligned} \Delta G_3 &= \Delta G(\text{OOH}^*) - \Delta G(\text{O}^*) + \text{K}T \ln a_{\text{H}^+} - eU \\ &= E(\text{OOH}^*) - E(\text{O}^*) - [\text{E}(\text{H}_2\text{O}) - 1/2\text{E}(\text{H}_2)] + \Delta \text{ZPE} - T\Delta S + \text{K}T \ln a_{\text{H}^+} - eU \end{aligned} \quad (7)$$

$$\begin{aligned} \Delta G_4 &= \Delta G(*) + \Delta G(\text{O}_2) - \Delta G(\text{OOH}^*) + \text{K}T \ln a_{\text{H}^+} - eU \\ &= E(*) - E(\text{OOH}^*) + 4.92 + [2\text{E}(\text{H}_2\text{O}) - 1/2\text{E}(\text{H}_2)] + \Delta \text{ZPE} - T\Delta S + \text{K}T \ln a_{\text{H}^+} - eU \end{aligned} \quad (8)$$

Here, K is Boltzmann constant,  $a_{\text{H}^+}$  represents the activity of protons, U is the potential at the electrode and e is the charge transferred. At standard conditions (pH= 0, T=298.15 K) and U =0, Gibbs energies reduce to

$$\begin{aligned}\Delta G_1 &= \Delta G(\text{OH}^*) - \Delta G(\text{H}_2\text{O}) \\ &= E(\text{OH}^*) - E(^*) - [E(\text{H}_2\text{O}) - 1/2E(\text{H}_2)] + \Delta \text{ZPE} - T\Delta S\end{aligned}\quad (9)$$

$$\begin{aligned}\Delta G_2 &= \Delta G(\text{O}^*) - \Delta G(\text{OH}^*) \\ &= E(\text{O}^*) - E(\text{OH}^*) + 1/2E(\text{H}_2) + \Delta \text{ZPE} - T\Delta S\end{aligned}\quad (10)$$

There exists a universal scaling relationship between  $\text{OH}^*$  and  $\text{OOH}^*$ , that is

$$E_{\text{ads}}(\text{OOH}^*) = E_{\text{ads}}(\text{OH}^*) + 3.2 \text{ [1]}$$

This means the energy difference between  $\text{OH}^*$  and  $\text{OOH}^*$  is constant and hence, independent of the binding strength to the surface. In terms of free energy, the scaling relationship becomes

$$\Delta G_3 = -\Delta G_2 + 3.2 \text{ [1]}\quad (11)$$

The process of electrolysis :  $\text{H}_2\text{O} (l) \rightarrow 1/2\text{O}_2 (g) + \text{H}_2(g)$  requires potential of 4.92 eV. As this process involves 4 steps, the potential required for charge transfer is same for each step and equals to 1.23 eV.

Therefore, Gibbs energy for 4th step can be calculated as

$$\Delta G_4 = 4.92 - (\Delta G_1 + \Delta G_2 + \Delta G_3)\quad (12)$$

Also,  $\Delta \text{ZPE} - T\Delta S$  is unknown for the adsorption on  $\text{O}^*$  and  $\text{OH}^*$  on the heterostructure and therefore, assumed to be zero.  $E(^*)$ ,  $E(\text{O}^*)$ ,  $E(\text{OH}^*)$ ,  $E(\text{H}_2\text{O})$ ,  $E(\text{H}_2)$  are the energies calculated using DFT. The calculated adsorption energies of  $\text{O}^*$  and  $\text{OH}^*$  on different surfaces/sites are reported in Table.S1.

**Table S4. Total energy of adsorption of O atom and OH molecule.**

| S.No. | Surface             | Total Energy (eV) | E ads (eV) | Bond length (Å)                                       |
|-------|---------------------|-------------------|------------|-------------------------------------------------------|
| 1.    | MoS <sub>2</sub> +O | -68.76584279      | +1.26      | d(Mo1-O) = 1.99<br>d(Mo2-O) = 1.89<br>d(Mo3-O) = 1.89 |

|    |                                                         |               |       |                                                                        |
|----|---------------------------------------------------------|---------------|-------|------------------------------------------------------------------------|
| 2. | MoS <sub>2</sub> +OH                                    | -71.93280111  | +0.55 | d(Mo1-O) = 2.16<br>d(Mo2-O) = 2.16<br>d(Mo3-O) = 2.05<br>d(O-H) = 0.99 |
| 3. | Co@NC+O (N-site)                                        | -190.49062787 | +1.42 | d(N-O) = 1.83                                                          |
| 4. | Co@NC+O (C-site)                                        | -190.69369699 | +1.21 | d(C1-O) = 1.90<br>d(C1-O) = 1.71                                       |
| 5. | Co@NC+OH (N-site)                                       | -195.59675697 | -1.24 | d(N-O) = 1.83<br>d(O-H) = 0.98                                         |
| 6. | Co@NC+OH (C-site)                                       | -195.38499636 | -1.02 | d(C1-O) = 1.90<br>d(C1-O) = 1.71<br>d(O-H) = 0.98                      |
| 7. | Co@NC@MoS <sub>2</sub> + O<br>(O on MoS <sub>2</sub> )  | -242.87172627 | -2.82 | d(Mo -O)= 1.75                                                         |
| 8. | Co@NC@MoS <sub>2</sub> +OH<br>(OH on MoS <sub>2</sub> ) | -246.27386288 | -3.77 | d(Mo -O)= 1.91<br>d(O-H) = 1.01                                        |

**Table S5. Enthalpies of adsorbates participating in the OER process:**

| Surface          | Total Energy (in eV) |
|------------------|----------------------|
| H <sub>2</sub> O | -14.876580475        |
| H <sub>2</sub>   | -6.88852316          |
| H                | -3.44426158          |
| O <sub>2</sub>   | -9.27246678          |
| H                | -4.63623339          |
| OH               | -7.08922806          |

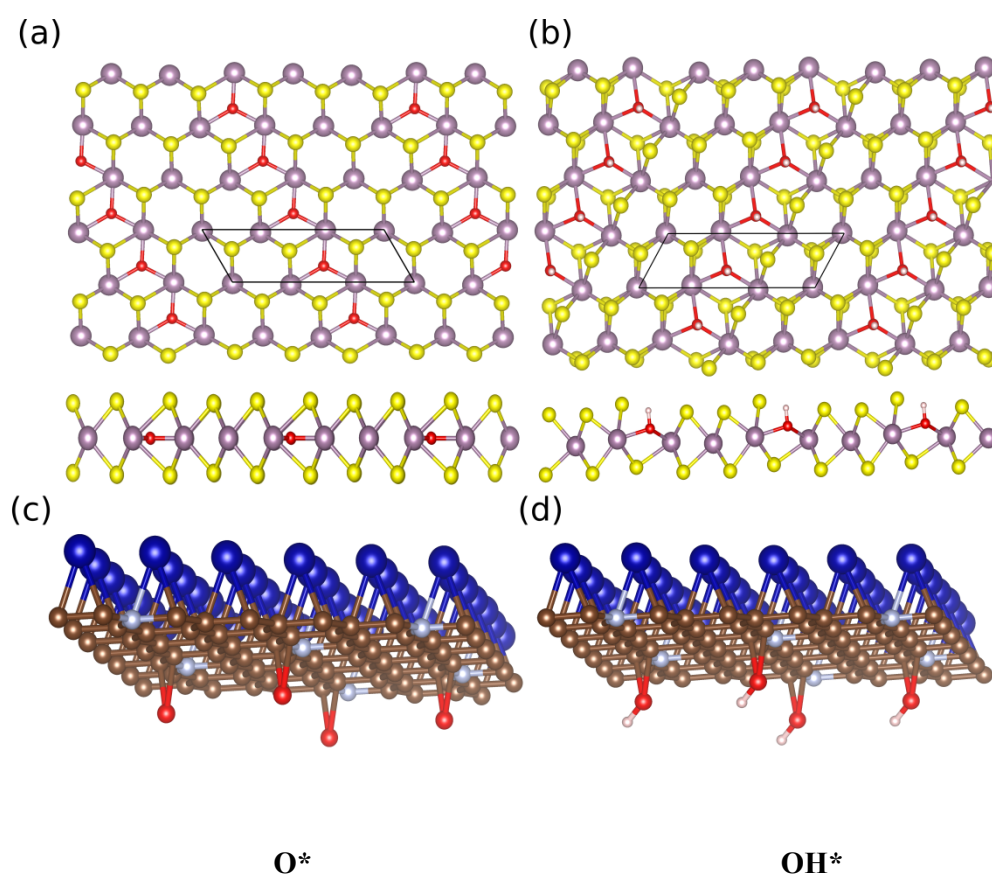

**Figure S14.** Atomic configurations of the intermediates adsorption  $O^*$  and  $OH^*$  on  $MoS_2$  and  $Co@NC$  surfaces. (a), (b) represent the top and side views of the adsorption on  $MoS_2$  and (c), (d) represent the lateral views of adsorption on  $Co@NC$  surface.



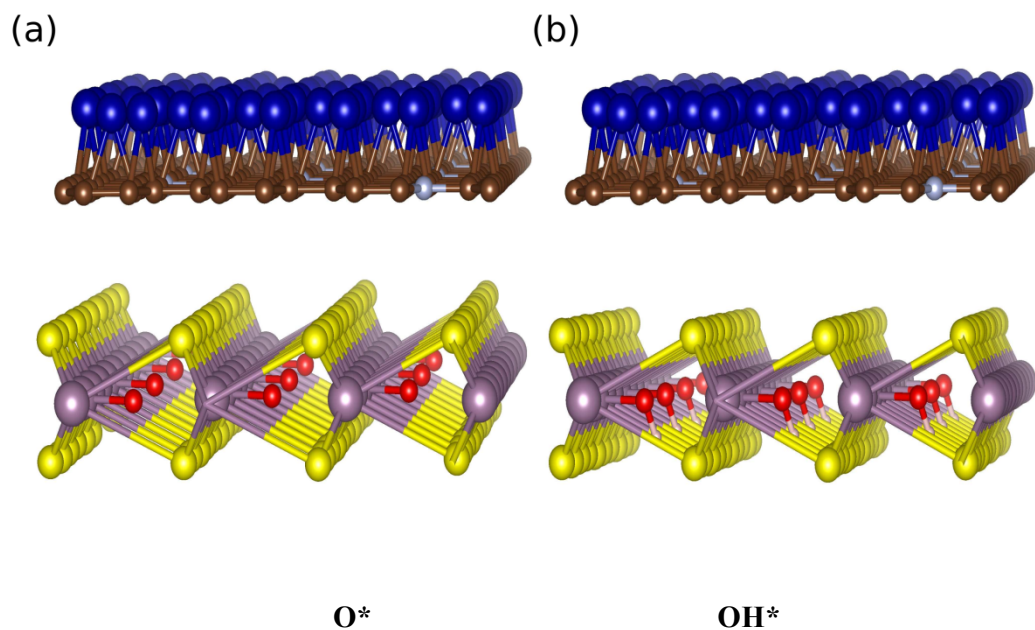

**Figure S15** .Atomic configurations of the intermediates adsorption (a) O\* and (b) OH\* on Co@NC@MoS<sub>2</sub> heterostructure.

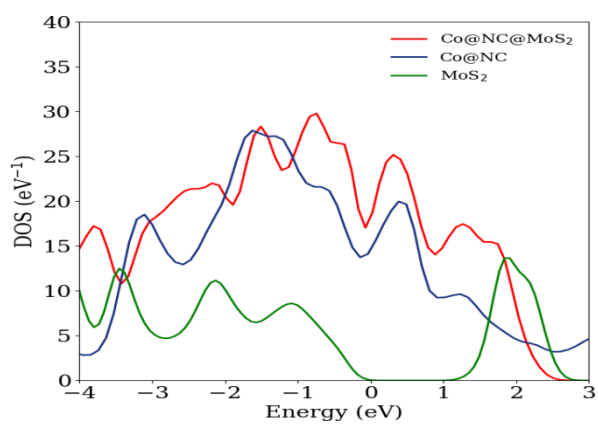

**Figure S16** Calculated density of states for MoS<sub>2</sub>,Co@NC and CO@NC@MoS<sub>2</sub> systems

## References

- [1] Su, Yunhe, et al. "Cobalt nanoparticles embedded in N-doped carbon as an efficient bifunctional electrocatalyst for oxygen reduction and evolution reactions." *Nanoscale* 6.24 (2014): 15080-15089.
- [2] Shen, Mengxia, et al. "Nanocellulose-assisted synthesis of ultrafine Co nanoparticles-loaded bimodal micro-mesoporous N-rich carbon as bifunctional oxygen electrode for Zn-air batteries." *Journal of Power Sources* 450 (2020): 227640.
- [3] Hou, Ya-Nan, et al. "Designed synthesis of cobalt nanoparticles embedded carbon nanocages as bifunctional electrocatalysts for oxygen evolution and reduction." *Carbon* 144 (2019): 492-499.
- [4] Zhao, Jujiao, et al. "Cobalt nanoparticles encapsulated in porous carbons derived from core-shell ZIF67@ZIF8 as efficient electrocatalysts for oxygen evolution reaction." *ACS applied materials & interfaces* 9.34 (2017): 28685-28694.
- [5] Mohanty, Bishnupad, et al. "MoS<sub>2</sub> quantum dots as efficient catalyst materials for the oxygen evolution reaction." *Acs Catalysis* 8.3 (2018): 1683-1689.
- [6] Xiong, Qizhong, et al. "Cobalt covalent doping in MoS<sub>2</sub> to induce bifunctionality of overall water splitting." *Advanced materials* 30.29 (2018): 1801450.
- [7] Man, I.C., Su, H.- Y., Calle- Vallejo, F., Hansen, H.A., Martínez, J.I., Inoglu, N.G., Kitchin, J., Jaramillo, T.F., Nørskov, J.K. and Rossmeisl, J. (2011), Universality in Oxygen Evolution Electrocatalysis on Oxide Surfaces. *ChemCatChem*, 3: 1159-1165.
